# Supplementary material for: Association of Specific Mental Disorders With Premature Mortality in the Danish Population Using Alternative Measurement Methods
Source: PubMed Central journal article supplement (PMC7272122; doi:10.1001/jamanetworkopen.2020.6646), 2020-06-03
Supplement: jamanetwopen-3-e206646-s001.pdf [file jamanetwopen-3-e206646-s001.pdf]

## Supplementary Online Content

Weye N, Momen NC, Christensen MK, et al. Association of specific mental disorders with premature mortality in the Danish population using alternative measurement methods. *JAMA Netw Open*. 2020;3(6):e206646.  
doi:10.1001/jamanetworkopen.2020.6646

**eMethods.** Life-Years Lost (LYL) Method

**eTable 1.** Diagnostic Classification of Mental Disorders Considered in This Study According to *ICD-10* Diagnoses

**eTable 2.** Diagnostic Classification of Causes of Death Considered for Years of Life Lost (YLL) Analyses and Life-Years Lost (LYL) Analyses According to *ICD-10* Diagnoses

**eTable 3.** Age and Remaining Life Expectancy Estimated Using Theoretical Minimum-Risk Reference Life Tables

**eTable 4.** Number of Cases, Person-Years at Risk, and Number of Deaths for All Male Individuals and Male Individuals Diagnosed With Each Specific Mental Disorder

**eTable 5.** Number of Cases, Person-Years at Risk, and Number of Deaths for All Female Individuals and Female Individuals Diagnosed With Each Specific Mental Disorder

**eTable 6.** Cause-Specific Years of Life Lost (YLL) for Men and Women in Denmark in 2015

**eTable 7.** Cause-Specific Life-Years Lost (LYL) for Each Specific Mental Disorder, Any Mental Disorder, and Multiple Mental Disorders

### eReferences

This supplementary material has been provided by the authors to give readers additional information about their work.

## **eMethods. Life-Years Lost Method**

The LYL method estimates remaining life expectancy at each possible age of onset. For each age-specific life expectancy, mortality rates from that age until the set upper age limit, in this study set to 95 years, are used. However, if there are no individuals diagnosed and alive in the older ages, the mortality rates for these older ages will be zero, which could underestimate the true LYLs.

We addressed this issue by modelling the mortality rates after certain age thresholds. Disorders that had less than 10 cases near age 70 were estimated using observed mortality rates until age 70 and modelled mortality rates from age 70 years onwards. These disorders were cocaine use disorder, amphetamine use disorder, eating disorders (overall), anorexia, bulimia and ADHD in both men and women. Conduct disorder in men and women had less than 10 cases at age 50 years or earlier and was modelled from age 50 years onwards.

Age-specific life expectancy for each specific mental disorder was estimated using observed mortality rates up until the age threshold. After this age threshold, a conservative approach was applied assuming the mortality rates in the general population to apply in the diseased population.

**eTable 1.** Diagnostic Classification of Mental Disorders Considered in This Study According to *ICD-10* Diagnoses

| Disorder groups (and subgroups)                  | ICD-10 codes                                                                                                                                                                                              | Earliest age of onset (years) | Comments                                                                                                                                                                                                                                                                                                                                                                                                                                               |
|--------------------------------------------------|-----------------------------------------------------------------------------------------------------------------------------------------------------------------------------------------------------------|-------------------------------|--------------------------------------------------------------------------------------------------------------------------------------------------------------------------------------------------------------------------------------------------------------------------------------------------------------------------------------------------------------------------------------------------------------------------------------------------------|
| Alcohol use disorders                            | F10.2                                                                                                                                                                                                     | 10                            |                                                                                                                                                                                                                                                                                                                                                                                                                                                        |
| Drug use disorders (overall)                     | F11.2, F12.2, F13.2, F14.2, F15.2, F16.2, F18.2                                                                                                                                                           | 10                            |                                                                                                                                                                                                                                                                                                                                                                                                                                                        |
| Opioid use disorder                              | F11.2                                                                                                                                                                                                     | 10                            |                                                                                                                                                                                                                                                                                                                                                                                                                                                        |
| Cannabis use disorder                            | F12.2                                                                                                                                                                                                     | 10                            |                                                                                                                                                                                                                                                                                                                                                                                                                                                        |
| Cocaine use disorder                             | F14.2                                                                                                                                                                                                     | 10                            |                                                                                                                                                                                                                                                                                                                                                                                                                                                        |
| Amphetamine use disorder                         | F15.2                                                                                                                                                                                                     | 10                            |                                                                                                                                                                                                                                                                                                                                                                                                                                                        |
| Other drug use disorders                         | F13.2, F16.2, F18.2                                                                                                                                                                                       | 10                            |                                                                                                                                                                                                                                                                                                                                                                                                                                                        |
| Schizophrenia                                    | F20                                                                                                                                                                                                       | 10                            |                                                                                                                                                                                                                                                                                                                                                                                                                                                        |
| Bipolar disorder                                 | F30, F31 (except F31.7), F34.0                                                                                                                                                                            | 10                            |                                                                                                                                                                                                                                                                                                                                                                                                                                                        |
| Depressive disorders (overall)                   | F32, F33, F34.1                                                                                                                                                                                           | 10                            |                                                                                                                                                                                                                                                                                                                                                                                                                                                        |
| Major depressive disorder                        | F32, F33                                                                                                                                                                                                  | 10                            |                                                                                                                                                                                                                                                                                                                                                                                                                                                        |
| Dysthymia                                        | F34.1                                                                                                                                                                                                     | 10                            |                                                                                                                                                                                                                                                                                                                                                                                                                                                        |
| Anxiety disorders                                | F40, F41, F42, F43.1, F93.0-F93.2, F93.8                                                                                                                                                                  | 1                             |                                                                                                                                                                                                                                                                                                                                                                                                                                                        |
| Eating disorders (overall)                       | F50.0, F50.1, F50.2                                                                                                                                                                                       | 1                             |                                                                                                                                                                                                                                                                                                                                                                                                                                                        |
| Anorexia nervosa                                 | F50.0, F50.1                                                                                                                                                                                              | 1                             |                                                                                                                                                                                                                                                                                                                                                                                                                                                        |
| Bulimia nervosa                                  | F50.2                                                                                                                                                                                                     | 1                             |                                                                                                                                                                                                                                                                                                                                                                                                                                                        |
| Personality disorders                            | F60                                                                                                                                                                                                       | 10                            | GBD names this group "Other mental disorders"                                                                                                                                                                                                                                                                                                                                                                                                          |
| Idiopathic developmental intellectual disability | F70-F79, Z81.0                                                                                                                                                                                            | 1                             |                                                                                                                                                                                                                                                                                                                                                                                                                                                        |
| Autism spectrum disorder                         | F84                                                                                                                                                                                                       | 1                             |                                                                                                                                                                                                                                                                                                                                                                                                                                                        |
| ADHD                                             | F90                                                                                                                                                                                                       | 1                             |                                                                                                                                                                                                                                                                                                                                                                                                                                                        |
| Conduct disorder                                 | F91.0-F91.2, F91.8                                                                                                                                                                                        | 1                             |                                                                                                                                                                                                                                                                                                                                                                                                                                                        |
| At least one disorder                            | F10.2, F11.2, F12.2, F13.2, F14.2, F15.2, F16.2, F18.2, F20, F30-F33 (except F31.7), F34.0, F34.1, F40-F42, F43.1, F50.0-F50.2, F60, F70-F79, F84, F90, F91.0-F91.2, F91.8, F93.0-F93.2, F93.8, Z81.0     | 1                             |                                                                                                                                                                                                                                                                                                                                                                                                                                                        |
| At least two, three or four disorders            | F11.2, F12.2, F13.2, F14.2, F15.2, F16.2, F18.2, F20, F30, F31 (except F31.7), F34.0, F32, F33, F34.1, F40, F41, F42, F43.1, F93.0-F93.2, F93.8, F50, F60, F70-F79.9, Z81.0, F84, F90, F91.0-F91.2, F91.8 | 1                             | A person has to be diagnosed with at least two, three or four of the following disorders: alcohol use disorder, amphetamine use disorder, cannabis use disorder, cocaine use disorder, opioid use disorder, other drug use disorders, schizophrenia, bipolar disorder, dysthymia, major depressive disorder, anxiety disorder, anorexia, bulimia, personality disorder, intellectual disability, autism spectrum disorder, ADHD, and conduct disorder. |

**eTable 2.** Diagnostic Classification of Causes of Death Considered for Years of Life Lost (YLL) Analyses and Life-Years Lost (LYL) Analyses According to *ICD-10* Diagnoses

| Causes of death                    | Years of life lost (YLLs)                                                             | Life-years lost (LYLs)                                      |
|------------------------------------|---------------------------------------------------------------------------------------|-------------------------------------------------------------|
| Alcohol use disorder               | ICD-10: F10-F10.9, G31.2, G72.1, P04.3, Q86.0, R78.0, X45-X45.9, X65-X65.9, Y15-Y15.9 | ICD-10: F10, I85, K70                                       |
| Drug use disorders                 | ICD-10: F11-F16.9, F18-F19.9, P04.4, P96.1, R78.1-R78.5                               | ICD-10: F11, F13-F16, F18-F19, P96.1, F78.1-R78.5           |
| Eating disorders                   | ICD-10: F50.0-F50.5                                                                   | ICD-10: F50.0-F50.5                                         |
| Suicide                            | ICD-10: X60-X64.9, X66-X84.9, Y87.0                                                   | ICD-10: X60-X84, Y87.0                                      |
| Infectious diseases                | -                                                                                     | ICD-10: A00-B99                                             |
| Neoplasms                          | -                                                                                     | ICD-10: C00-D09                                             |
| Diabetes mellitus                  | -                                                                                     | ICD-10: E10-E14                                             |
| Diseases of the circulatory system | -                                                                                     | ICD-10: F03.9, I00-I25, I27, I30-I52, I60-I84, I86-I99, R54 |
| Respiratory diseases               | -                                                                                     | ICD-10: J00-J99                                             |
| Digestive diseases                 | -                                                                                     | ICD-10: K00-K69, K71-K93                                    |
| Accidents                          | -                                                                                     | ICD-10: V01-X59, Y10-Y86, Y87.2, Y88-Y89                    |
| Homicide                           | -                                                                                     | ICD-10: X85-Y09, Y87.1                                      |
| Other causes of death              | -                                                                                     | The remaining ICD-10 codes or a missing cause of death      |

**eTable 3.** Age and Remaining Life Expectancy Estimated Using Theoretical Minimum-Risk Reference Life Tables

| Age | Life Expectancy |
|-----|-----------------|
| 0   | 86.6            |
| 1   | 85.8            |
| 5   | 81.8            |
| 10  | 76.8            |
| 15  | 71.9            |
| 20  | 66.9            |
| 25  | 62.0            |
| 30  | 57.0            |
| 35  | 52.1            |
| 40  | 47.2            |
| 45  | 42.4            |
| 50  | 37.6            |
| 55  | 32.9            |
| 60  | 28.3            |
| 65  | 23.8            |
| 70  | 19.4            |
| 75  | 15.3            |
| 80  | 11.5            |
| 85  | 8.2             |
| 90  | 5.5             |
| 95  | 3.7             |

Theoretical Minimum-Risk Reference Life Tables were the same as those used in the GBD 2016 study.<sup>1</sup> Life expectancy was linearly interpolated within age groups to estimate life expectancy for each year of age. Both columns are in years.

**eTable 4.** Number of Cases, Person-Years at Risk, and Number of Deaths for All Male Individuals and Male Individuals Diagnosed With Each Specific Mental Disorder

|                                  | No. of cases | Person-years at risk | Deaths  | Percentage deaths | Rate of deaths |
|----------------------------------|--------------|----------------------|---------|-------------------|----------------|
| All males living in Denmark      | 3,481,219    | 42,542,043           | 419,959 | 12.1              | 9.9            |
| <b>Specific mental disorders</b> |              |                      |         |                   |                |
| Alcohol use disorder             | 36,193       | 291,607              | 11,430  | 31.6              | 39.2           |
| Drug use disorders (overall)     | 17,613       | 123,586              | 2,683   | 15.2              | 21.7           |
| Opioid use disorder              | 3,802        | 30,617               | 1,114   | 29.3              | 36.4           |
| Cannabis use disorder            | 11,960       | 78,339               | 1,130   | 9.4               | 14.4           |
| Cocaine use disorder             | 1,338        | 8,136                | 167     | 12.5              | 20.5           |
| Amphetamine use disorder         | 1,740        | 11,385               | 208     | 12.0              | 18.3           |
| Other drug disorders             | 3,309        | 23,450               | 905     | 27.3              | 38.6           |
| Schizophrenia                    | 22,827       | 215,428              | 4,574   | 20.0              | 21.2           |
| Bipolar disorder                 | 11,571       | 84,747               | 2,722   | 23.5              | 32.1           |
| Depressive disorders (overall)   | 70,042       | 501,178              | 14,601  | 20.8              | 29.1           |
| Major Depressive Disorder        | 2,509        | 19,787               | 441     | 17.6              | 22.3           |
| Dysthymia                        | 68,828       | 490,607              | 14,405  | 20.9              | 29.4           |
| Anxiety disorders                | 43,893       | 300,874              | 3,117   | 7.1               | 10.4           |
| Eating disorders (overall)       | 690          | 4,982                | 15      | 2.2               | 3.0            |
| Anorexia                         | 577          | 4,059                | 11      | 1.9               | 2.7            |
| Bulimia                          | 124          | 1,013                | 5       | 4.0               | 4.9            |
| Personality disorders            | 29,542       | 274,580              | 3,865   | 13.1              | 14.1           |
| Intellectual disability          | 13,527       | 108,774              | 1,303   | 9.6               | 12.0           |
| Autism spectrum disorders        | 22,947       | 152,064              | 189     | 0.8               | 1.2            |
| ADHD                             | 32,048       | 180,433              | 293     | 0.9               | 1.6            |
| Conduct disorder                 | 1,691        | 15,132               | 38      | 2.2               | 2.5            |
| Number of disorders              |              |                      |         |                   |                |
| 1+                               | 198,240      | 1,540,987            | 30,666  | 15.5              | 19.9           |
| 2+                               | 73,177       | 517,725              | 9,683   | 13.2              | 18.7           |
| 3+                               | 24,114       | 158,244              | 3,469   | 14.4              | 21.9           |
| 4+                               | 8,268        | 50,167               | 1,333   | 16.1              | 26.6           |

The denominators for percentage and rate of deaths are the number of cases and the person-years at risk for the specific disorder, respectively. Rates are shown per 1,000 person-years.

**eTable 5.** Number of Cases, Person-Years at Risk, and Number of Deaths for All Female Individuals and Female Individuals Diagnosed With Each Specific Mental Disorder

|                                  | No. of cases | Person-years at risk | Deaths  | Percentage deaths | Rate of deaths |
|----------------------------------|--------------|----------------------|---------|-------------------|----------------|
| All females living in Denmark    | 3,508,408    | 43,369,418           | 413,488 | 11.8              | 9.5            |
| <b>Specific mental disorders</b> |              |                      |         |                   |                |
| Alcohol use disorder             | 18,717       | 158,770              | 5,212   | 27.8              | 32.8           |
| Drug use disorders (overall)     | 9,158        | 67,788               | 1,760   | 19.2              | 26             |
| Opioid use disorder              | 1,962        | 16,243               | 576     | 29.4              | 35.5           |
| Cannabis use disorder            | 3,789        | 23,713               | 203     | 5.4               | 8.6            |
| Cocaine use disorder             | 475          | 3,313                | 32      | 6.7               | 9.7            |
| Amphetamine use disorder         | 675          | 4,737                | 59      | 8.7               | 12.5           |
| Other drug disorders             | 4,003        | 31,216               | 1,192   | 29.8              | 38.2           |
| Schizophrenia                    | 16,431       | 152,834              | 3,272   | 19.9              | 21.4           |
| Bipolar disorders                | 16,941       | 130,105              | 3,812   | 22.5              | 29.3           |
| Depressive disorders (overall)   | 119,433      | 900,912              | 22,439  | 18.8              | 24.9           |
| Dysthymia                        | 4,520        | 37,377               | 758     | 16.8              | 20.3           |
| Major Depressive Disorder        | 117,415      | 882,017              | 22,102  | 18.8              | 25.1           |
| Anxiety disorders                | 68,087       | 495,866              | 4,624   | 6.8               | 9.3            |
| Eating disorders (overall)       | 13,866       | 112,990              | 236     | 1.7               | 2.1            |
| Anorexia                         | 9,274        | 71,329               | 192     | 2.1               | 2.7            |
| Bulimia                          | 5,471        | 48,281               | 71      | 1.3               | 1.5            |
| Personality disorders            | 54,205       | 491,093              | 4,547   | 8.4               | 9.3            |
| Intellectual disability          | 9,022        | 71,843               | 1,124   | 12.5              | 15.6           |
| Autism spectrum disorders        | 7,669        | 41,802               | 58      | 0.8               | 1.4            |
| ADHD                             | 14,575       | 63,947               | 66      | 0.5               | 1.0            |
| Conduct disorder                 | 518          | 4,549                | 15      | 2.9               | 3.3            |
| Number of disorders              |              |                      |         |                   |                |
| 1+                               | 227,732      | 1,839,943            | 34,149  | 15.0              | 18.6           |
| 2+                               | 84,494       | 622,732              | 9,220   | 10.9              | 14.8           |
| 3+                               | 28,543       | 190,139              | 2,979   | 10.4              | 15.7           |
| 4+                               | 9,054        | 55,389               | 1,068   | 11.8              | 19.3           |

The denominators for percentage and rate of deaths are the number of cases and the person-years at risk for the specific disorder, respectively. Rates are shown per 1,000 person-years.

**eTable 6.** Cause-Specific Years of Life Lost (YLL) for Men and Women in Denmark in 2015

| Cause of death       | GBD 2016                  |                          |
|----------------------|---------------------------|--------------------------|
|                      | Absolute YLL<br>(95% CI)  | Rate of YLL*<br>(95% CI) |
| Males                |                           |                          |
| Alcohol use disorder | 15,555<br>(13,168;18,479) | 551<br>(467;655)         |
| Drug use disorders   | 7,098<br>(5,243;8,755)    | 252<br>(186;310)         |
| Eating disorders     | 2<br>(1;2)                | 0.1<br>(0.0;0.1)         |
| Suicide              | 18,553<br>(14,741;31,190) | 658<br>(522;1,106)       |
| Females              |                           |                          |
| Alcohol use disorder | 4,308<br>(3,533;5,147)    | 151<br>(124;180)         |
| Drug use disorders   | 2,036<br>(1,659;2,488)    | 71<br>(58;87)            |
| Eating disorders     | 69<br>(51;91)             | 2<br>(2;3)               |
| Suicide              | 5,446<br>(4,535;6,408)    | 191<br>(159;224)         |

\*Rate per 100,000 person-years.

Estimates are based on deaths occurring in 2015. Extracted from GBD Results Tool on 1 November 2018. Downloaded from <http://ghdx.healthdata.org/gbd-results-tool> on 1 November 2018.



**eTable 7. Cause-Specific Life-Years Lost (LYL) for Each Specific Mental Disorder, Any Mental Disorder, and Multiple Mental Disorders**

| Mental disorder              | Cause of death                     | Excess life-years lost (95% CI) |                     |
|------------------------------|------------------------------------|---------------------------------|---------------------|
|                              |                                    | Men                             | Women               |
| Alcohol use disorder         | All cause                          | 14.43 (14.22;14.66)             | 13.54 (7.94;13.79)  |
| Alcohol use disorder         | Infectious diseases                | 0.20 (0.14;0.27)                | 0.22 (0.13;0.31)    |
| Alcohol use disorder         | Neoplasms                          | -0.65 (-0.85;-0.45)             | -0.02 (-0.3;0.26)   |
| Alcohol use disorder         | Diabetes                           | 0.12 (0.04;0.20)                | 0.11 (0.02;0.20)    |
| Alcohol use disorder         | Diseases of the circulatory system | -0.09 (-0.3;0.13)               | 0.23 (-0.04;0.49)   |
| Alcohol use disorder         | Respiratory diseases               | 0.91 (0.75;1.09)                | 1.68 (1.45;1.93)    |
| Alcohol use disorder         | Digestive disorders                | 0.79 (0.67;0.90)                | 0.80 (0.64;0.97)    |
| Alcohol use disorder         | Alcohol related                    | 7.72 (7.45;7.98)                | 5.96 (5.66;6.24)    |
| Alcohol use disorder         | Drug related                       | 0.18 (0.14;0.23)                | 0.17 (0.12;0.22)    |
| Alcohol use disorder         | Eating disorders                   | -                               | -                   |
| Alcohol use disorder         | Suicide                            | 1.60 (1.47;1.73)                | 1.32 (1.17;1.49)    |
| Alcohol use disorder         | Accidents                          | 2.35 (2.17;2.51)                | 1.99 (1.80;2.21)    |
| Alcohol use disorder         | Homicide                           | 0.10 (0.07;0.13)                | 0.05 (0.02;0.08)    |
| Alcohol use disorder         | Other causes of death              | 1.20 (1.03;1.38)                | 1.03 (0.79;1.26)    |
| Drug use disorders (overall) | All cause                          | 17.99 (17.49;18.53)             | 15.29 (14.70;15.88) |
| Drug use disorders (overall) | Infectious diseases                | 0.46 (0.27;0.66)                | 0.49 (0.29;0.70)    |
| Drug use disorders (overall) | Neoplasms                          | -1.18 (-1.67;-0.61)             | -1.06 (-1.49;-0.62) |
| Drug use disorders (overall) | Diabetes                           | 0.25 (0.03;0.48)                | 0.17 (0.01;0.35)    |
| Drug use disorders (overall) | Diseases of the circulatory system | -0.93 (-1.42;-0.44)             | 0.52 (0.10;0.98)    |
| Drug use disorders (overall) | Respiratory diseases               | 2.13 (1.64;2.62)                | 2.67 (2.21;3.17)    |
| Drug use disorders (overall) | Digestive disorders                | 0.65 (0.40;0.93)                | 0.66 (0.41;0.96)    |
| Drug use disorders (overall) | Alcohol related                    | 4.32 (3.80;4.85)                | 2.70 (2.29;3.14)    |
| Drug use disorders (overall) | Drug related                       | 1.19 (0.97;1.44)                | 0.70 (0.50;0.93)    |
| Drug use disorders (overall) | Eating disorders                   | -                               | -                   |
| Drug use disorders (overall) | Suicide                            | 2.38 (2.06;2.75)                | 2.30 (1.93;2.72)    |
| Drug use disorders (overall) | Accidents                          | 6.29 (5.78;6.81)                | 3.99 (3.48;4.56)    |
| Drug use disorders (overall) | Homicide                           | 0.24 (0.14;0.34)                | -                   |
| Drug use disorders (overall) | Other causes of death              | 2.19 (1.75;2.68)                | 2.12 (1.66;2.63)    |
| Opioid use disorder          | All cause                          | 20.07 (19.32;20.91)             | 19.00 (18.05;19.98) |
| Opioid use disorder          | Infectious diseases                | 0.90 (0.54;1.29)                | 1.09 (0.65;1.64)    |
| Opioid use disorder          | Neoplasms                          | -1.11 (-2.06;-0.21)             | -0.63 (-1.54;0.27)  |
| Opioid use disorder          | Diabetes                           | -0.12 (-0.35;0.17)              | 0.31 (-0.06;0.69)   |
| Opioid use disorder          | Diseases of the circulatory system | -1.20 (-1.92;-0.43)             | 0.88 (0.02;1.85)    |
| Opioid use disorder          | Respiratory diseases               | 2.09 (1.34;3.00)                | 2.35 (1.48;3.28)    |
| Opioid use disorder          | Digestive disorders                | 0.79 (0.33;1.32)                | 0.96 (0.46;1.50)    |
| Opioid use disorder          | Alcohol related                    | 3.66 (2.80;4.52)                | 2.58 (1.82;3.32)    |
| Opioid use disorder          | Drug related                       | 2.00 (1.54;2.51)                | 1.24 (0.77;1.75)    |
| Opioid use disorder          | Eating disorders                   | -                               | -                   |
| Opioid use disorder          | Suicide                            | 1.86 (1.39;2.37)                | 2.35 (1.68;3.02)    |

|                       |                                    |                     |                     |
|-----------------------|------------------------------------|---------------------|---------------------|
| Opioid use disorder   | Accidents                          | 8.78 (7.86;9.68)    | 5.54 (4.45;6.67)    |
| Opioid use disorder   | Homicide                           | 0.15 (0.03;0.30)    | -                   |
| Opioid use disorder   | Other causes of death              | 2.27 (1.56;3.09)    | 2.29 (1.39;3.21)    |
| Cannabis use disorder | All cause                          | 15.71 (13.08;17.01) | 12.25 (8.60;16.17)  |
| Cannabis use disorder | Infectious diseases                | 0.16 (-0.04;0.39)   | 0.84 (0.29;1.47)    |
| Cannabis use disorder | Neoplasms                          | -1.32 (-2.25;-0.33) | -1.08 (-2.69;0.75)  |
| Cannabis use disorder | Diabetes                           | 0.49 (-0.05;1.27)   | 0.09 (-0.31;0.64)   |
| Cannabis use disorder | Diseases of the circulatory system | -1.95 (-2.61;-1.13) | -1.72 (-2.67;-0.59) |
| Cannabis use disorder | Respiratory diseases               | 4.36 (2.01;5.53)    | 4.40 (1.68;7.89)    |
| Cannabis use disorder | Digestive disorders                | 0.01 (-0.23;0.26)   | -                   |
| Cannabis use disorder | Alcohol related                    | 3.42 (2.65;4.17)    | 3.11 (1.69;4.76)    |
| Cannabis use disorder | Drug related                       | 1.04 (0.74;1.38)    | 0.35 (0.06;0.77)    |
| Cannabis use disorder | Eating disorders                   | -                   | -                   |
| Cannabis use disorder | Suicide                            | 2.10 (1.64;2.58)    | 1.58 (0.69;2.61)    |
| Cannabis use disorder | Accidents                          | 5.16 (4.42;5.90)    | 3.47 (2.39;4.66)    |
| Cannabis use disorder | Homicide                           | 0.24 (0.10;0.39)    | -                   |
| Cannabis use disorder | Other causes of death              | 1.99 (1.20;2.88)    | 0.75 (-0.41;2.1)    |
| Other drug disorders  | All cause                          | 16.60 (15.80;17.39) | 12.09 (11.44;12.76) |
| Other drug disorders  | Infectious diseases                | 0.17 (-0.06;0.43)   | 0.24 (0.07;0.43)    |
| Other drug disorders  | Neoplasms                          | -1.52 (-2.20;-0.78) | -1.10 (-1.55;-0.55) |
| Other drug disorders  | Diabetes                           | 0.25 (-0.07;0.64)   | 0.13 (-0.03;0.33)   |
| Other drug disorders  | Diseases of the circulatory system | -1.13 (-1.82;-0.36) | 0.72 (0.21;1.21)    |
| Other drug disorders  | Respiratory diseases               | 1.67 (1.05;2.29)    | 2.60 (2.12;3.14)    |
| Other drug disorders  | Digestive disorders                | 0.68 (0.31;1.10)    | 0.61 (0.33;0.89)    |
| Other drug disorders  | Alcohol related                    | 4.87 (4.07;5.72)    | 2.17 (1.75;2.60)    |
| Other drug disorders  | Drug related                       | 0.85 (0.53;1.18)    | 0.46 (0.25;0.68)    |
| Other drug disorders  | Eating disorders                   | -                   | -                   |
| Other drug disorders  | Suicide                            | 2.60 (2.00;3.23)    | 1.64 (1.28;2.03)    |
| Other drug disorders  | Accidents                          | 6.15 (5.29;7.02)    | 2.88 (2.32;3.34)    |
| Other drug disorders  | Homicide                           | 0.18 (0.05;0.35)    | -                   |
| Other drug disorders  | Other causes of death              | 1.84 (1.11;2.57)    | 1.69 (1.22;2.17)    |
| Schizophrenia         | All cause                          | 13.80 (13.47;14.14) | 11.77 (11.38;12.13) |
| Schizophrenia         | Infectious diseases                | 0.33 (0.20;0.46)    | 0.16 (0.07;0.27)    |
| Schizophrenia         | Neoplasms                          | -0.85 (-1.19;-0.52) | 0.42 (0.07;0.77)    |
| Schizophrenia         | Diabetes                           | 0.56 (0.39;0.73)    | 0.43 (0.28;0.57)    |
| Schizophrenia         | Diseases of the circulatory system | 0.93 (0.57;1.29)    | 1.39 (1.06;1.72)    |
| Schizophrenia         | Respiratory diseases               | 2.15 (1.84;2.44)    | 2.12 (1.83;2.41)    |
| Schizophrenia         | Digestive disorders                | 0.63 (0.45;0.81)    | 0.25 (0.10;0.41)    |
| Schizophrenia         | Alcohol related                    | 1.07 (0.85;1.27)    | 0.58 (0.42;0.74)    |
| Schizophrenia         | Drug related                       | 0.29 (0.21;0.38)    | 0.09 (0.03;0.14)    |
| Schizophrenia         | Eating disorders                   | -                   | 0.03 (0.01;0.07)    |
| Schizophrenia         | Suicide                            | 1.94 (1.70;2.18)    | 1.39 (1.17;1.61)    |
| Schizophrenia         | Accidents                          | 2.63 (2.37;2.89)    | 1.44 (1.20;1.67)    |
| Schizophrenia         | Homicide                           | 0.07 (0.03;0.12)    | -                   |

|                                |                                    |                     |                     |
|--------------------------------|------------------------------------|---------------------|---------------------|
| Schizophrenia                  | Other causes of death              | 4.04 (3.70;4.42)    | 3.48 (3.10;3.87)    |
| Bipolar disorder               | All cause                          | 8.81 (8.40;9.17)    | 8.06 (7.73;8.40)    |
| Bipolar disorder               | Infectious diseases                | 0.19 (0.08;0.30)    | 0.22 (0.13;0.32)    |
| Bipolar disorder               | Neoplasms                          | -1.43 (-1.76;-1.08) | -0.36 (-0.64;-0.04) |
| Bipolar disorder               | Diabetes                           | 0.25 (0.09;0.42)    | 0.24 (0.13;0.34)    |
| Bipolar disorder               | Diseases of the circulatory system | 1.19 (0.79;1.56)    | 0.97 (0.71;1.23)    |
| Bipolar disorder               | Respiratory diseases               | 0.90 (0.63;1.18)    | 1.29 (1.05;1.53)    |
| Bipolar disorder               | Digestive disorders                | 0.28 (0.12;0.46)    | 0.33 (0.20;0.47)    |
| Bipolar disorder               | Alcohol related                    | 1.47 (1.18;1.78)    | 0.72 (0.57;0.89)    |
| Bipolar disorder               | Drug related                       | 0.06 (0.01;0.12)    | 0.07 (0.03;0.13)    |
| Bipolar disorder               | Eating disorders                   | -                   | -                   |
| Bipolar disorder               | Suicide                            | 2.17 (1.88;2.46)    | 1.55 (1.31;1.78)    |
| Bipolar disorder               | Accidents                          | 1.38 (1.13;1.64)    | 0.83 (0.66;1.02)    |
| Bipolar disorder               | Homicide                           | 0.04 (0.00;0.10)    | 0.05 (0.01;0.09)    |
| Bipolar disorder               | Other causes of death              | 2.30 (1.95;2.69)    | 2.15 (1.88;2.42)    |
| Depressive disorders (overall) | All cause                          | 8.25 (8.07;8.43)    | 6.38 (6.23;6.53)    |
| Depressive disorders (overall) | Infectious diseases                | 0.15 (0.10;0.20)    | 0.10 (0.07;0.14)    |
| Depressive disorders (overall) | Neoplasms                          | -0.65 (-0.81;-0.49) | -0.08 (-0.20;0.06)  |
| Depressive disorders (overall) | Diabetes                           | 0.37 (0.29;0.45)    | 0.14 (0.09;0.18)    |
| Depressive disorders (overall) | Diseases of the circulatory system | 0.90 (0.74;1.08)    | 0.99 (0.88;1.11)    |
| Depressive disorders (overall) | Respiratory diseases               | 0.72 (0.60;0.84)    | 1.01 (0.91;1.11)    |
| Depressive disorders (overall) | Digestive disorders                | 0.24 (0.17;0.31)    | 0.24 (0.18;0.30)    |
| Depressive disorders (overall) | Alcohol related                    | 1.68 (1.53;1.81)    | 0.85 (0.77;0.94)    |
| Depressive disorders (overall) | Drug related                       | 0.07 (0.04;0.10)    | 0.04 (0.03;0.06)    |
| Depressive disorders (overall) | Eating disorders                   | -                   | 0.01 (0.00;0.01)    |
| Depressive disorders (overall) | Suicide                            | 2.53 (2.38;2.67)    | 1.25 (1.16;1.35)    |
| Depressive disorders (overall) | Accidents                          | 0.93 (0.83;1.04)    | 0.60 (0.54;0.68)    |
| Depressive disorders (overall) | Homicide                           | 0.03 (0.01;0.05)    | 0.02 (0.01;0.03)    |
| Depressive disorders (overall) | Other causes of death              | 1.28 (1.13;1.43)    | 1.21 (1.11;1.32)    |
| Major Depressive Disorder      | All cause                          | 8.27 (8.10;8.47)    | 6.40 (6.25;6.55)    |
| Major Depressive Disorder      | Infectious diseases                | 0.15 (0.10;0.20)    | 0.11 (0.07;0.14)    |
| Major Depressive Disorder      | Neoplasms                          | -0.65 (-0.81;-0.47) | -0.08 (-0.22;0.06)  |
| Major Depressive Disorder      | Diabetes                           | 0.37 (0.29;0.45)    | 0.14 (0.09;0.19)    |
| Major Depressive Disorder      | Diseases of the circulatory system | 0.90 (0.73;1.08)    | 1.00 (0.88;1.11)    |
| Major Depressive Disorder      | Respiratory diseases               | 0.71 (0.59;0.83)    | 0.99 (0.88;1.10)    |
| Major Depressive Disorder      | Digestive disorders                | 0.24 (0.17;0.32)    | 0.24 (0.18;0.29)    |
| Major Depressive Disorder      | Alcohol related                    | 1.67 (1.54;1.81)    | 0.85 (0.77;0.93)    |

|                           |                                    |                     |                     |
|---------------------------|------------------------------------|---------------------|---------------------|
| Major Depressive Disorder | Drug related                       | 0.07 (0.04;0.10)    | 0.04 (0.03;0.06)    |
| Major Depressive Disorder | Eating disorders                   | -                   | 0.01 (0.00;0.01)    |
| Major Depressive Disorder | Suicide                            | 2.56 (2.40;2.72)    | 1.27 (1.18;1.35)    |
| Major Depressive Disorder | Accidents                          | 0.92 (0.81;1.03)    | 0.60 (0.54;0.67)    |
| Major Depressive Disorder | Homicide                           | 0.03 (0.01;0.05)    | 0.02 (0.00;0.03)    |
| Major Depressive Disorder | Other causes of death              | 1.30 (1.14;1.45)    | 1.22 (1.11;1.33)    |
| Dysthymia                 | All cause                          | 7.54 (6.62;8.52)    | 6.25 (5.46;7.01)    |
| Dysthymia                 | Infectious diseases                | 0.14 (-0.13;0.44)   | -0.01 (-0.13;0.13)  |
| Dysthymia                 | Neoplasms                          | -1.45 (-2.32;-0.51) | -0.42 (-1.08;0.23)  |
| Dysthymia                 | Diabetes                           | 0.70 (0.25;1.27)    | 0.07 (-0.10;0.28)   |
| Dysthymia                 | Diseases of the circulatory system | 0.93 (-0.03;1.90)   | 0.72 (0.15;1.30)    |
| Dysthymia                 | Respiratory diseases               | 1.08 (0.40;1.80)    | 1.81 (1.22;2.37)    |
| Dysthymia                 | Digestive disorders                | 0.27 (-0.10;0.71)   | 0.26 (-0.01;0.61)   |
| Dysthymia                 | Alcohol related                    | 1.67 (0.98;2.49)    | 0.87 (0.50;1.27)    |
| Dysthymia                 | Drug related                       | -                   | -                   |
| Dysthymia                 | Eating disorders                   | -                   | -                   |
| Dysthymia                 | Suicide                            | 2.42 (1.64;3.18)    | 1.08 (0.71;1.48)    |
| Dysthymia                 | Accidents                          | 1.26 (0.68;1.94)    | 0.89 (0.51;1.26)    |
| Dysthymia                 | Homicide                           | -                   | -                   |
| Dysthymia                 | Other causes of death              | 0.50 (-0.16;1.28)   | 0.89 (0.41;1.41)    |
| Anxiety disorders         | All cause                          | 7.52 (7.13;7.92)    | 6.32 (6.03;6.61)    |
| Anxiety disorders         | Infectious diseases                | 0.08 (-0.02;0.19)   | 0.11 (0.04;0.18)    |
| Anxiety disorders         | Neoplasms                          | -1.25 (-1.62;-0.88) | -0.20 (-0.48;0.06)  |
| Anxiety disorders         | Diabetes                           | 0.08 (-0.06;0.24)   | 0.15 (0.06;0.25)    |
| Anxiety disorders         | Diseases of the circulatory system | 0.59 (0.21;0.99)    | 0.65 (0.41;0.90)    |
| Anxiety disorders         | Respiratory diseases               | 1.37 (1.06;1.68)    | 1.63 (1.39;1.88)    |
| Anxiety disorders         | Digestive disorders                | 0.40 (0.22;0.57)    | 0.21 (0.10;0.32)    |
| Anxiety disorders         | Alcohol related                    | 2.13 (1.85;2.41)    | 1.08 (0.93;1.23)    |
| Anxiety disorders         | Drug related                       | 0.15 (0.09;0.22)    | 0.05 (0.02;0.08)    |
| Anxiety disorders         | Eating disorders                   | -                   | 0.01 (0.00;0.03)    |
| Anxiety disorders         | Suicide                            | 1.57 (1.34;1.78)    | 0.93 (0.81;1.07)    |
| Anxiety disorders         | Accidents                          | 1.29 (1.07;1.50)    | 0.70 (0.58;0.83)    |
| Anxiety disorders         | Homicide                           | 0.04 (0.00;0.09)    | 0.00 (-0.01;0.02)   |
| Anxiety disorders         | Other causes of death              | 1.08 (0.77;1.40)    | 1.01 (0.79;1.23)    |
| Personality disorders     | All cause                          | 10.61 (10.20;11.03) | 8.47 (8.12;8.78)    |
| Personality disorders     | Infectious diseases                | 0.16 (0.05;0.28)    | 0.16 (0.08;0.25)    |
| Personality disorders     | Neoplasms                          | -1.23 (-1.60;-0.86) | -0.40 (-0.68;-0.12) |
| Personality disorders     | Diabetes                           | 0.36 (0.20;0.54)    | 0.20 (0.10;0.30)    |
| Personality disorders     | Diseases of the circulatory system | 0.48 (0.06;0.87)    | 0.92 (0.64;1.20)    |
| Personality disorders     | Respiratory diseases               | 0.92 (0.64;1.23)    | 1.54 (1.29;1.78)    |
| Personality disorders     | Digestive disorders                | 0.34 (0.19;0.52)    | 0.32 (0.19;0.45)    |
| Personality disorders     | Alcohol related                    | 2.57 (2.28;2.88)    | 1.26 (1.10;1.43)    |
| Personality disorders     | Drug related                       | 0.19 (0.12;0.26)    | 0.12 (0.08;0.17)    |
| Personality disorders     | Eating disorders                   | -                   | 0.03 (0.01;0.06)    |

|                           |                                    |                     |                     |
|---------------------------|------------------------------------|---------------------|---------------------|
| Personality disorders     | Suicide                            | 2.49 (2.23;2.75)    | 1.62 (1.46;1.79)    |
| Personality disorders     | Accidents                          | 2.59 (2.32;2.86)    | 1.27 (1.11;1.44)    |
| Personality disorders     | Homicide                           | 0.12 (0.07;0.18)    | 0.02 (0.00;0.05)    |
| Personality disorders     | Other causes of death              | 1.62 (1.27;1.95)    | 1.40 (1.16;1.65)    |
| Intellectual disability   | All cause                          | 13.52 (12.89;14.13) | 14.05 (13.32;14.74) |
| Intellectual disability   | Infectious diseases                | 0.38 (0.17;0.63)    | 0.26 (0.07;0.49)    |
| Intellectual disability   | Neoplasms                          | -2.09 (-2.58;-1.51) | -0.72 (-1.29;-0.07) |
| Intellectual disability   | Diabetes                           | 0.38 (0.11;0.69)    | 0.29 (0.07;0.53)    |
| Intellectual disability   | Diseases of the circulatory system | 1.30 (0.68;1.97)    | 2.88 (2.16;3.55)    |
| Intellectual disability   | Respiratory diseases               | 1.59 (1.11;2.07)    | 1.79 (1.27;2.37)    |
| Intellectual disability   | Digestive disorders                | 1.31 (0.89;1.74)    | 0.49 (0.21;0.81)    |
| Intellectual disability   | Alcohol related                    | 0.42 (0.07;0.78)    | 0.15 (-0.07;0.39)   |
| Intellectual disability   | Drug related                       | 0.15 (0.03;0.30)    | -                   |
| Intellectual disability   | Eating disorders                   | -                   | -                   |
| Intellectual disability   | Suicide                            | 0.34 (0.08;0.65)    | 0.41 (0.18;0.68)    |
| Intellectual disability   | Accidents                          | 1.83 (1.34;2.36)    | 0.74 (0.42;1.08)    |
| Intellectual disability   | Homicide                           | -                   | -                   |
| Intellectual disability   | Other causes of death              | 7.88 (7.05;8.71)    | 7.76 (6.86;8.69)    |
| Autism spectrum disorders | All cause                          | 8.03 (6.22;9.83)    | 11.29 (7.86;13.71)  |
| Autism spectrum disorders | Infectious diseases                | 0.71 (-0.21;2.14)   | -                   |
| Autism spectrum disorders | Neoplasms                          | -2.15 (-3.83;-0.03) | 2.26 (-1.64;7.00)   |
| Autism spectrum disorders | Diabetes                           | -                   | -                   |
| Autism spectrum disorders | Diseases of the circulatory system | 0.77 (-1.49;3.02)   | 2.76 (-1.01;7.25)   |
| Autism spectrum disorders | Respiratory diseases               | 0.72 (-0.71;2.50)   | -                   |
| Autism spectrum disorders | Digestive disorders                | 2.06 (0.69;3.68)    | -                   |
| Autism spectrum disorders | Alcohol related                    | -0.10 (-0.81;0.81)  | -                   |
| Autism spectrum disorders | Drug related                       | -                   | -                   |
| Autism spectrum disorders | Eating disorders                   | -                   | -                   |
| Autism spectrum disorders | Suicide                            | 0.66 (0.10;1.26)    | 0.57 (-0.12;1.58)   |
| Autism spectrum disorders | Accidents                          | -0.11 (-0.58;0.48)  | 1.44 (-0.19;4.07)   |
| Autism spectrum disorders | Homicide                           | -                   | -                   |
| Autism spectrum disorders | Other causes of death              | 5.25 (2.79;7.89)    | 3.85 (0.28;7.82)    |
| 1+                        | All cause                          | 11.22 (11.09;11.35) | 7.89 (7.76;8.01)    |
| 1+                        | Infectious diseases                | 0.20 (0.16;0.24)    | 0.14 (0.11;0.17)    |
| 1+                        | Neoplasms                          | -0.81 (-0.92;-0.68) | -0.02 (-0.13;0.09)  |
| 1+                        | Diabetes                           | 0.31 (0.26;0.36)    | 0.18 (0.14;0.22)    |
| 1+                        | Diseases of the circulatory system | 0.67 (0.55;0.79)    | 1.01 (0.92;1.12)    |
| 1+                        | Respiratory diseases               | 0.89 (0.81;0.98)    | 1.25 (1.17;1.34)    |
| 1+                        | Digestive disorders                | 0.50 (0.43;0.56)    | 0.31 (0.26;0.36)    |
| 1+                        | Alcohol related                    | 3.31 (3.19;3.43)    | 1.38 (1.30;1.45)    |
| 1+                        | Drug related                       | 0.17 (0.14;0.20)    | 0.06 (0.05;0.08)    |
| 1+                        | Eating disorders                   | -                   | 0.03 (0.02;0.03)    |
| 1+                        | Suicide                            | 2.06 (1.96;2.15)    | 1.09 (1.02;1.15)    |
| 1+                        | Accidents                          | 1.92 (1.81;2.02)    | 0.83 (0.77;0.89)    |

|    |                                    |                     |                     |
|----|------------------------------------|---------------------|---------------------|
| 1+ | Homicide                           | 0.07 (0.05;0.09)    | 0.02 (0.01;0.03)    |
| 1+ | Other causes of death              | 1.93 (1.82;2.06)    | 1.61 (1.52;1.70)    |
| 2+ | All cause                          | 12.91 (12.68;13.16) | 9.81 (9.60;10.05)   |
| 2+ | Infectious diseases                | 0.24 (0.17;0.31)    | 0.18 (0.12;0.25)    |
| 2+ | Neoplasms                          | -1.32 (-1.53;-1.12) | -0.41 (-0.61;-0.21) |
| 2+ | Diabetes                           | 0.27 (0.17;0.37)    | 0.16 (0.09;0.22)    |
| 2+ | Diseases of the circulatory system | 0.28 (0.05;0.51)    | 0.82 (0.63;0.99)    |
| 2+ | Respiratory diseases               | 1.20 (1.03;1.38)    | 1.60 (1.44;1.78)    |
| 2+ | Digestive disorders                | 0.57 (0.47;0.68)    | 0.42 (0.33;0.52)    |
| 2+ | Alcohol related                    | 3.87 (3.64;4.09)    | 2.06 (1.91;2.22)    |
| 2+ | Drug related                       | 0.29 (0.23;0.35)    | 0.13 (0.09;0.16)    |
| 2+ | Eating disorders                   | -                   | 0.04 (0.02;0.06)    |
| 2+ | Suicide                            | 2.65 (2.47;2.83)    | 1.74 (1.61;1.88)    |
| 2+ | Accidents                          | 2.79 (2.61;2.97)    | 1.41 (1.28;1.54)    |
| 2+ | Homicide                           | 0.10 (0.06;0.13)    | 0.02 (0.01;0.04)    |
| 2+ | Other causes of death              | 1.99 (1.77;2.20)    | 1.64 (1.47;1.81)    |
| 3+ | All cause                          | 15.02 (14.56;15.44) | 12.34 (11.89;12.79) |
| 3+ | Infectious diseases                | 0.25 (0.11;0.39)    | 0.23 (0.12;0.35)    |
| 3+ | Neoplasms                          | -1.70 (-2.04;-1.33) | -0.93 (-1.30;-0.60) |
| 3+ | Diabetes                           | 0.31 (0.14;0.51)    | 0.21 (0.08;0.34)    |
| 3+ | Diseases of the circulatory system | -0.08 (-0.49;0.33)  | 0.79 (0.46;1.14)    |
| 3+ | Respiratory diseases               | 1.35 (1.01;1.68)    | 1.82 (1.51;2.15)    |
| 3+ | Digestive disorders                | 0.49 (0.30;0.68)    | 0.43 (0.26;0.61)    |
| 3+ | Alcohol related                    | 4.43 (4.04;4.85)    | 2.83 (2.52;3.12)    |
| 3+ | Drug related                       | 0.52 (0.40;0.67)    | 0.29 (0.19;0.38)    |
| 3+ | Eating disorders                   | -                   | 0.04 (0.00;0.07)    |
| 3+ | Suicide                            | 2.97 (2.65;3.30)    | 2.41 (2.15;2.69)    |
| 3+ | Accidents                          | 4.06 (3.67;4.42)    | 2.24 (1.97;2.53)    |
| 3+ | Homicide                           | 0.13 (0.06;0.21)    | 0.06 (0.01;0.11)    |
| 3+ | Other causes of death              | 2.29 (1.90;2.66)    | 1.93 (1.61;2.28)    |
| 4+ | All cause                          | 17.40 (16.75;18.06) | 15.16 (14.30;15.94) |
| 4+ | Infectious diseases                | 0.10 (-0.08;0.33)   | 0.44 (0.19;0.72)    |
| 4+ | Neoplasms                          | -1.84 (-2.50;-1.14) | -1.10 (-1.69;-0.48) |
| 4+ | Diabetes                           | 0.38 (0.02;0.75)    | 0.27 (0.05;0.52)    |
| 4+ | Diseases of the circulatory system | -0.27 (-1.01;0.51)  | 0.73 (0.08;1.32)    |
| 4+ | Respiratory diseases               | 1.92 (1.26;2.60)    | 1.95 (1.39;2.57)    |
| 4+ | Digestive disorders                | 0.71 (0.34;1.10)    | 0.52 (0.17;0.86)    |
| 4+ | Alcohol related                    | 4.42 (3.77;5.13)    | 3.12 (2.59;3.69)    |
| 4+ | Drug related                       | 0.69 (0.46;0.95)    | 0.47 (0.28;0.70)    |
| 4+ | Eating disorders                   | -                   | 0.06 (0.00;0.14)    |
| 4+ | Suicide                            | 3.32 (2.79;3.91)    | 3.18 (2.62;3.76)    |
| 4+ | Accidents                          | 5.86 (5.19;6.60)    | 3.40 (2.86;3.94)    |
| 4+ | Homicide                           | 0.20 (0.06;0.39)    | -                   |
| 4+ | Other causes of death              | 1.91 (1.27;2.56)    | 2.09 (1.45;2.77)    |

Estimates based on less than three cases are not shown. All-cause LYLs for cocaine use disorder, amphetamine use disorder, eating disorders (overall), anorexia, bulimia, ADHD and conduct disorders are presented in Table 3.

## eReferences

1. Naghavi M, Abajobir AA, Abbafati C, et al. Global, regional, and national age-sex specific mortality for 264 causes of death, 1980–2016: a systematic analysis for the Global Burden of Disease Study 2016. *Lancet*. 2017;390(10100):1151-210.
